# Supplementary material for: Regulation of multifunctional mesoporous core–shell nanoparticles with luminescence and magnetic properties for biomedical applications
Source: Royal Society of Chemistry journal article supplement (doi:10.1039/c3tb21702g), 2014-01-01
Supplement: c3tb21702g1.pdf [file c3tb21702g1.pdf]

## Supporting Information

Regulation of multifunctional mesoporous core-shell nanoparticles with luminescence and magnetic properties for biomedical applications

Xiaoqing Hu, Mingliang Wang, Fei Miao, Jingwei Ma, Hebai Shen, Nengqin Jia\*

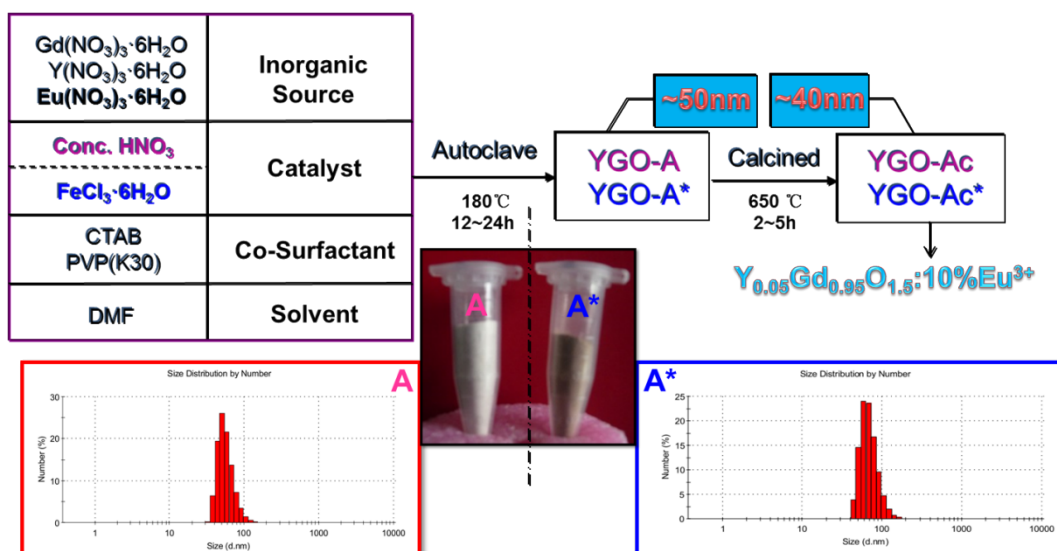

**Figure S1.** Flow chart of solvothermal synthetic procedures for (Y,Gd)<sub>2</sub>O<sub>3</sub>:Eu<sup>3+</sup> NPs. The inset at the bottom: DLS size distribution (in ethanol) of YGO-A NPs (left) and YGO-A\* NPs (right).

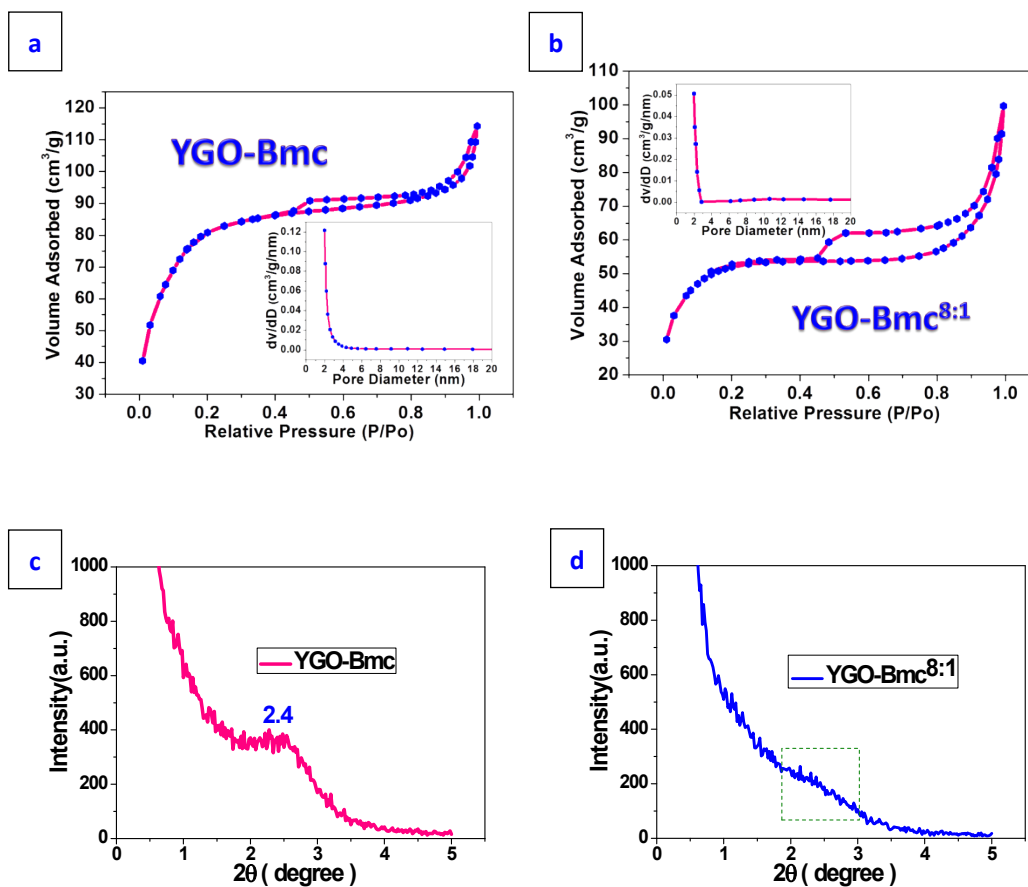

**Figure S2.** N<sub>2</sub> adsorption/desorption isotherms and mesopore size distribution curves (the inset) of (a) YGO-Bmc NPs, (b) YGO-Bmc<sup>8:1</sup> NPs; low-angle XRD patterns of (c) YGO-Bmc NPs, (d) YGO-Bmc<sup>8:1</sup> NPs.

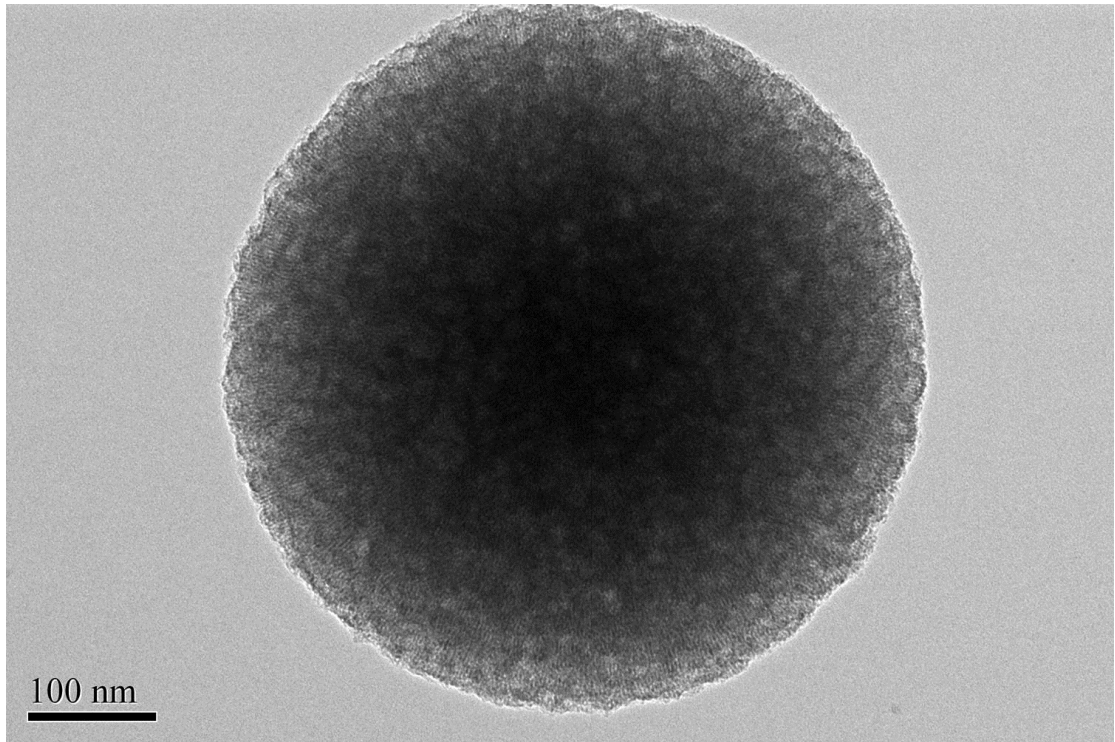

**Figure S3.** TEM image of mSiO<sub>2</sub>.

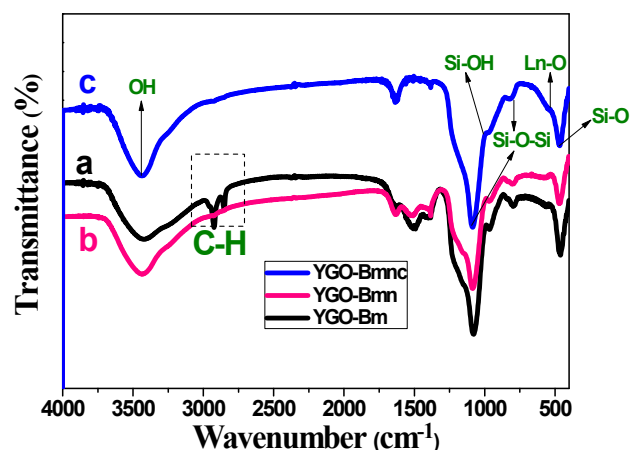

**Figure S4.** The FT-IR spectra of (a) YGO-Bm NPs, (b) YGO-Bmn NPs, (c) YGO-Bmnc NPs. Contrary to YGO-Bm NPs, the bands in the region 2800~3000  $\text{cm}^{-1}$  which attributed to the vibrations of  $-\text{CH}_3$ ,  $-\text{CH}_2$  of CTAB templates disappeared for YGO-Bmn NPs, suggesting that the CTAB templates are eradicated completely after  $\text{NH}_4\text{NO}_3/\text{EtOH}$  extraction. For YGO-Bmnc NPs, the new characteristic vibration of Ln-O bond in 543  $\text{cm}^{-1}$  turns up, demonstrating that the amorphous  $\text{Ln}(\text{OH})_3$  completely dehydrated and transformed into  $\text{Ln}_2\text{O}_3$  after calcination.

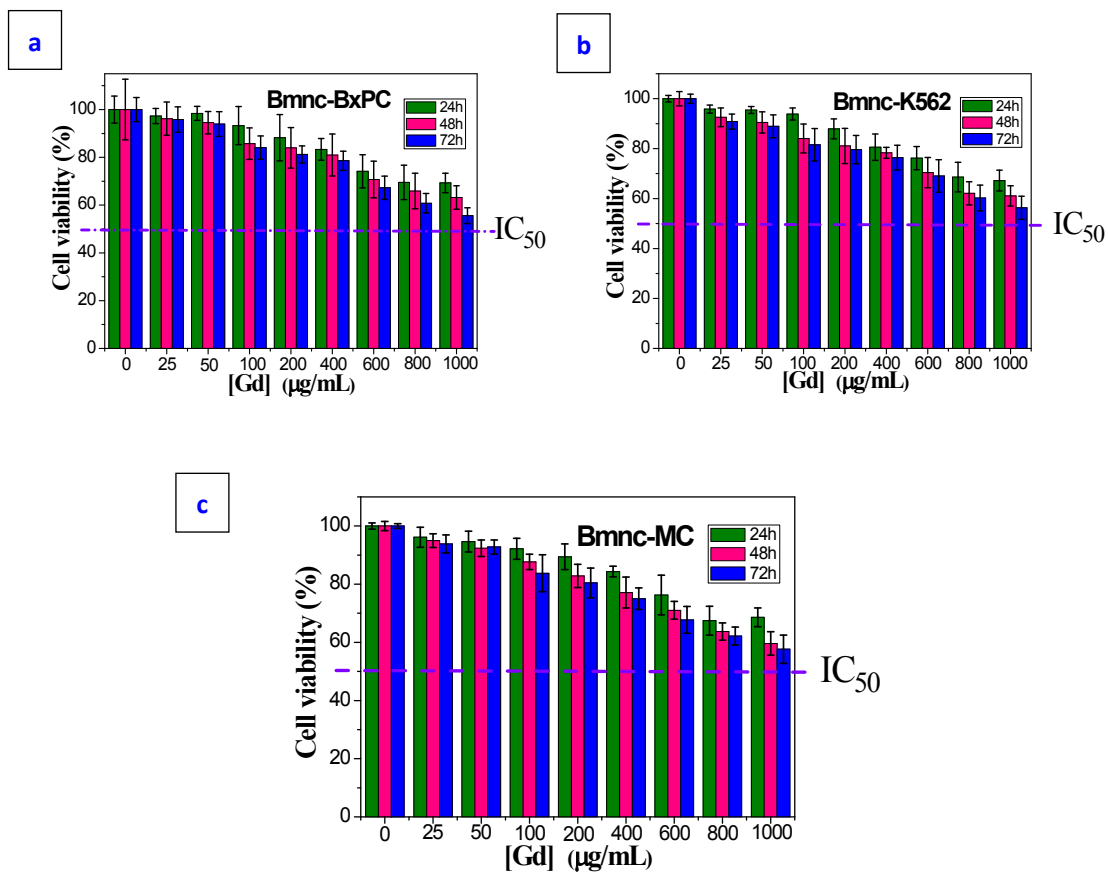

**Figure S5.** In vitro cytotoxicity of YGO-Bmnc NPs against BxPC-3, K562 and MC cells after 24 h, 48 h and 72h incubation.
